# Supplementary material for: Measurement report: Vertical and temporal variability of near-surface ozone production rate and sensitivity in an urban area in Pearl River Delta (PRD) region, China
Source: Copernicus journal article supplement (doi:10.5194/egusphere-2023-2230), 2024-01-22
Supplement: Supplementary file 1 [file egusphere-2023-2230-supplement.pdf]

Supplement for:

## Measurement report: Vertical and temporal variability of near-surface ozone production rate and sensitivity in an urban area in Pearl River Delta (PRD) region, China

Jun Zhou<sup>1,2#</sup>, Chunsheng Zhang<sup>3#</sup>, Aiming Liu<sup>3</sup>, Bin Yuan<sup>1,2\*</sup>, Yan Wang<sup>1,2</sup>, Wenjie Wang<sup>1,4</sup>, Jie-Ping Zhou<sup>1,2</sup>, Yixin Hao<sup>1,2</sup>, Xiao-Bing Li<sup>1,2\*</sup>, Xianjun He<sup>1,2</sup>, Xin Song<sup>1,2</sup>, Yubin Chen<sup>1,2</sup>, Suxia Yang<sup>1,2</sup>, Shuchun Yang<sup>1,2</sup>, Yanfeng Wu<sup>1,2</sup>, Bin Jiang<sup>1,2</sup>, Shan Huang<sup>1,2</sup>, Junwen Liu<sup>1,2</sup>, Jipeng Qi<sup>1,2</sup>, Minhui Deng<sup>1,2</sup>, Yibo Huangfu<sup>1,2</sup>, Min Shao<sup>1,2\*</sup>

<sup>1</sup>Institute for Environmental and Climate Research, Jinan University, Guangzhou 511443, China

<sup>2</sup>Guangdong-Hongkong-Macau Joint Laboratory of Collaborative Innovation for Environmental Quality, Guangzhou 511443, China

<sup>3</sup>Shenzhen National Climate Observatory, Shenzhen 518040, China

<sup>4</sup>Multiphase Chemistry Department, Max Planck Institute for Chemistry, Mainz 55128, Germany

#These authors contribute equally to this work.

Correspondence: Bin Yuan (byuan@jnu.edu.cn), Xiao-Bing Li (lixiaobing@jnu.edu.cn), Min Shao (mshao@jnu.edu.cn)

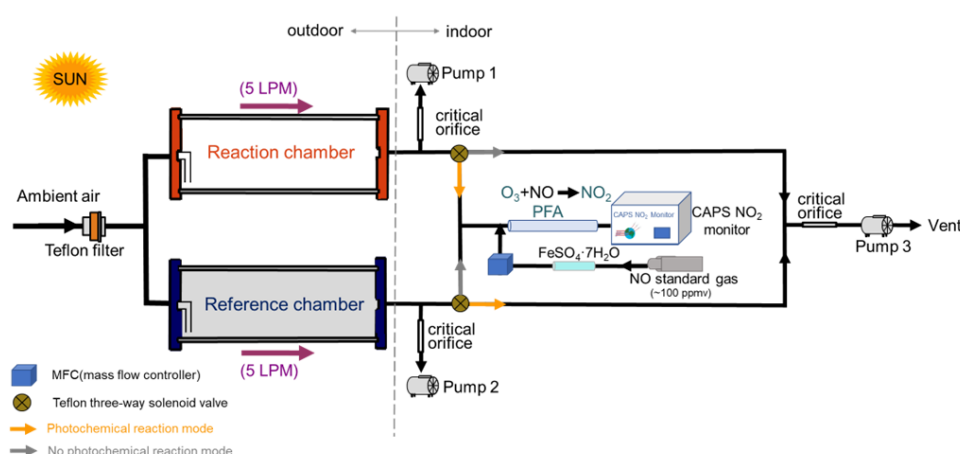

Figure S1: Schematic of the NPOPR detection system.

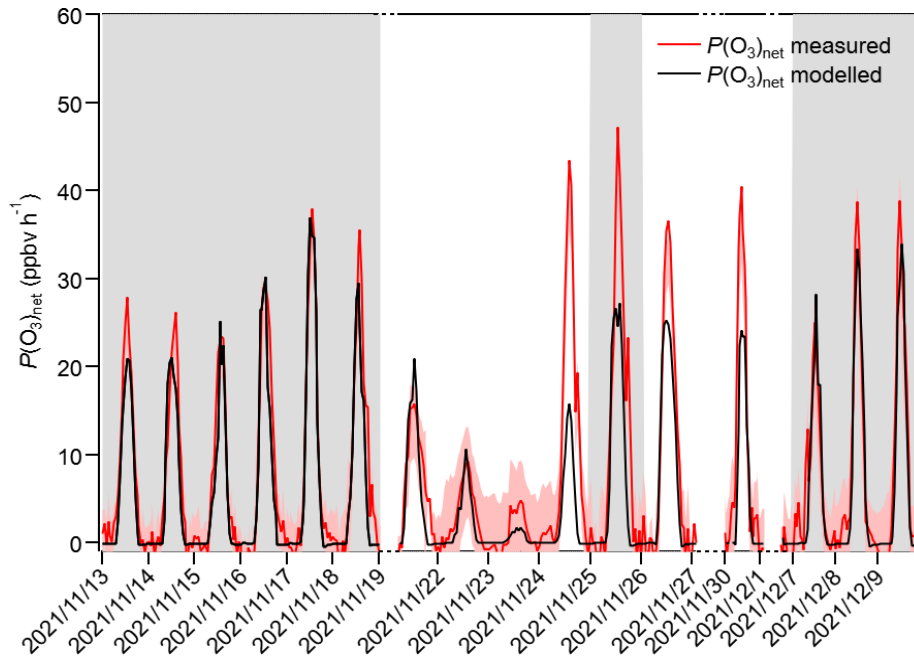

**Figure S2 :** Measured and modelled  $P(O_3)_{net}$  during the observation period from 13 November-9 December 2021

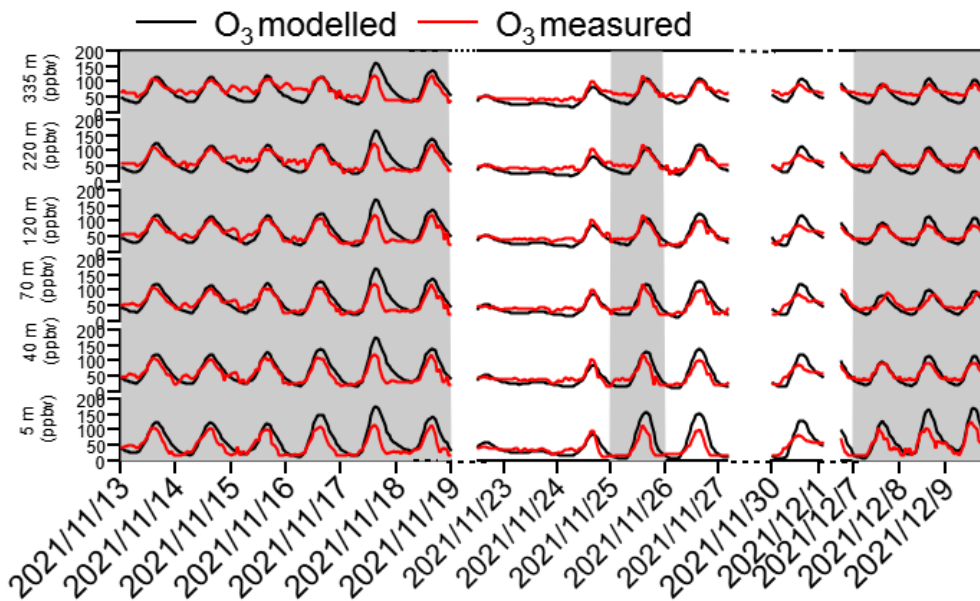

**Figure S3 :** Measured and modelled  $O_3$  concentrations at different heights during the observation period from 13 November-9 December 2021. The gray columns show the typical ozone episodes that occurred.

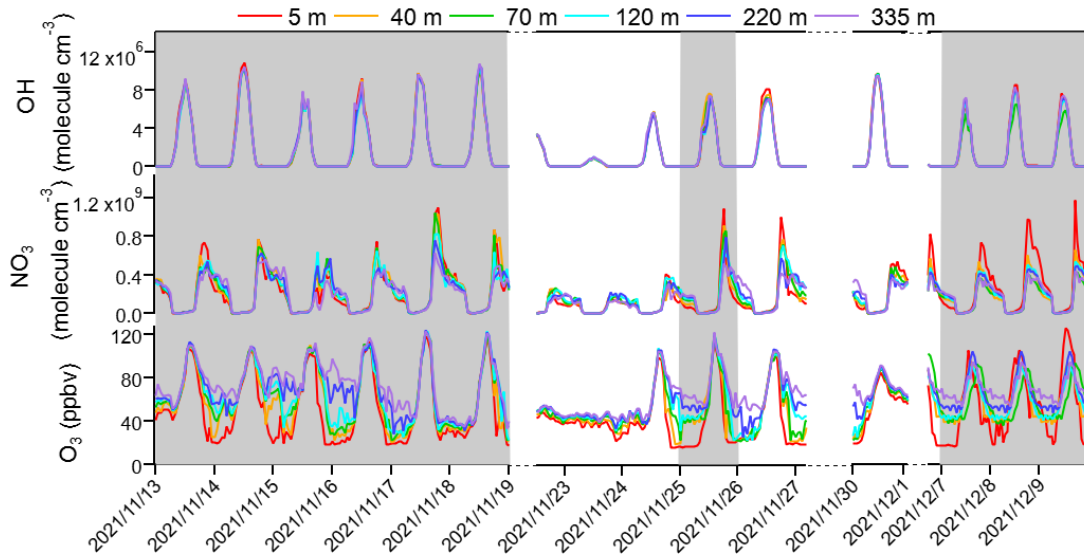

**Figure S4:** Time series of model-simulated OH and NO<sub>3</sub> concentrations in molecule cm<sup>-3</sup>, and measured O<sub>3</sub> concentrations in ppbv at six different heights during 13 November-9 December 2021, at SZMGT, the gray columns show the typical ozone pollution episodes that occurred.

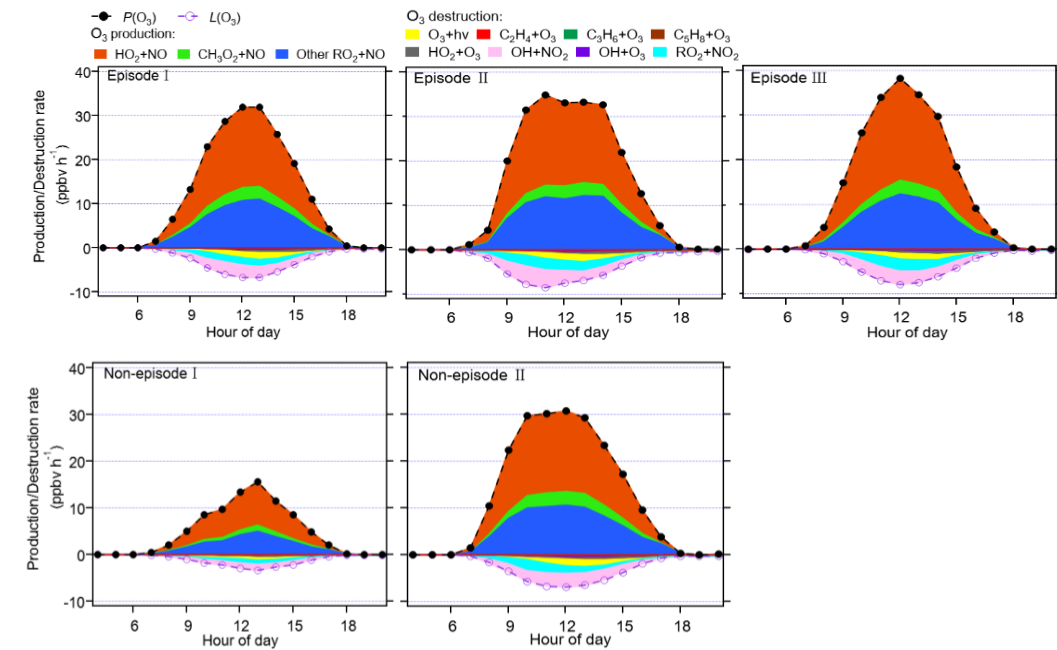

**Figure S5:** Average diurnal cycles of the model-simulated O<sub>3</sub> production and destruction rates at 5 m ground level during different episodes/non-episodes over the observation period.

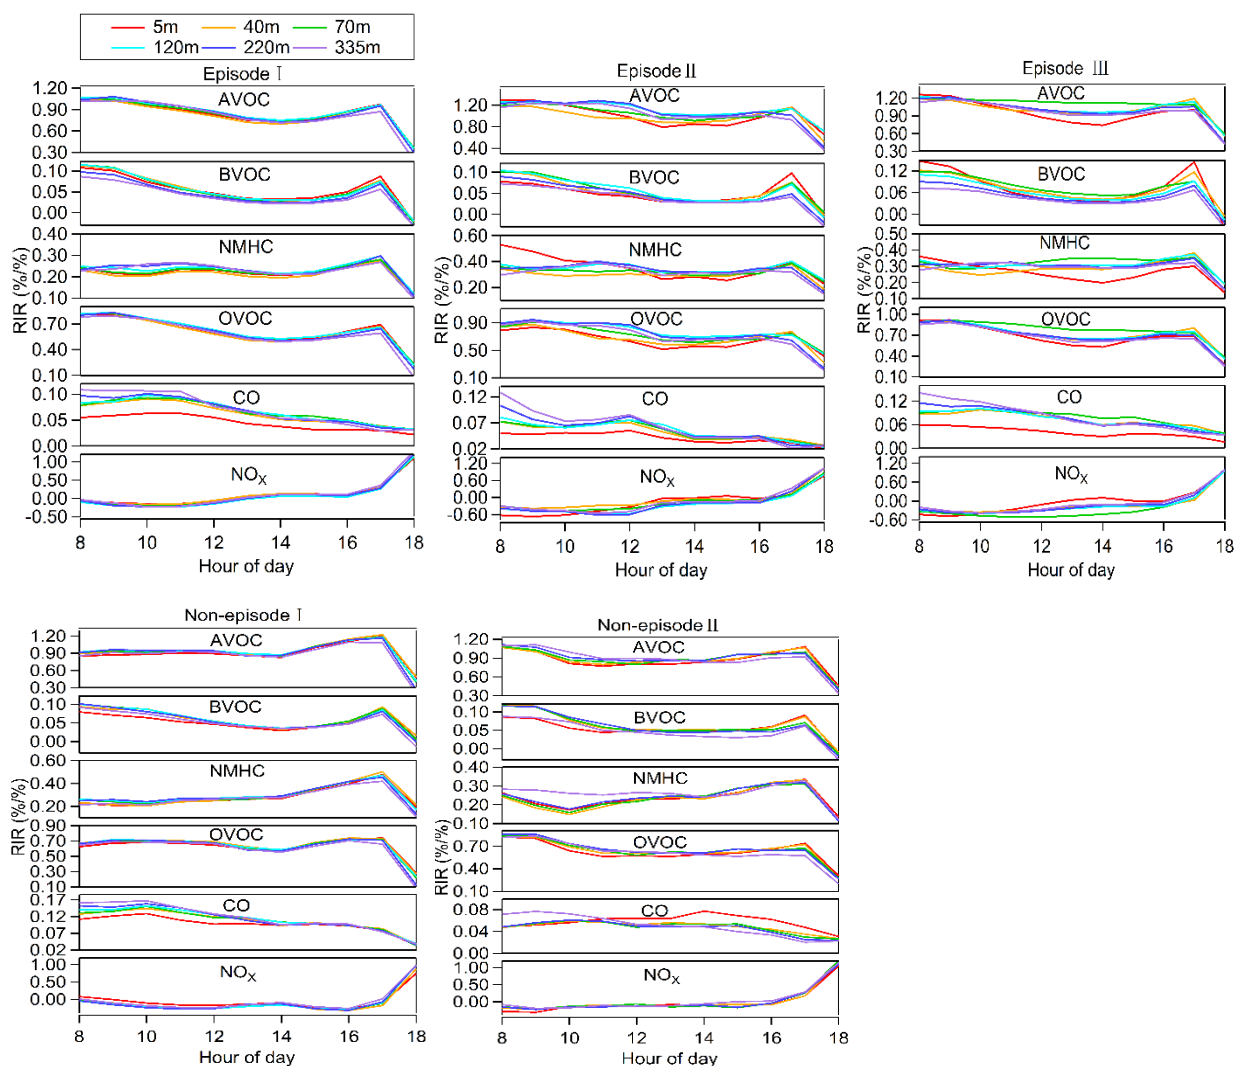

**Figure S6: RIRs for O<sub>3</sub>-precursor groups at different heights during local daytime (6:00-18:00).**

**Table S1. Modelled O<sub>3</sub> production and destruction reactions and their reaction rates used in MCM in this study**

| Reactions                                        | Rate coefficient / unit                                                                       | Number |
|--------------------------------------------------|-----------------------------------------------------------------------------------------------|--------|
| O <sub>3</sub> production pathways ( $P(O_3)$ )  |                                                                                               |        |
| $RO_2 + NO \rightarrow RO + NO_2$                | $2.7 \times 10^{-12} \times \exp(360/T) / \text{molecules}^{-1} \text{cm}^3 \text{s}^{-1}$    | (R1)   |
| $HO_2 + NO \rightarrow OH + NO_2$                | $3.45 \times 10^{-12} \times \exp(270/T) / \text{molecules}^{-1} \text{cm}^3 \text{s}^{-1}$   | (R2)   |
| O <sub>3</sub> destruction pathways ( $D(O_3)$ ) |                                                                                               |        |
| $O_3 + h\nu \rightarrow O^1D + O_2$              | Measured $JO^1D / \text{s}^{-1}$                                                              | (R3)   |
| $O_3 + C_2H_4 \rightarrow HCHO + CH_2OOA$        | $9.1 \times 10^{-15} \times \exp(-2580/T) / \text{molecules}^{-1} \text{cm}^3 \text{s}^{-1}$  | (R4)   |
| $O_3 + C_3H_6 \rightarrow CH_2OOB + CH_3CHO$     | $2.75 \times 10^{-15} \times \exp(-1880/T) / \text{molecules}^{-1} \text{cm}^3 \text{s}^{-1}$ | (R5)   |
| $O_3 + C_3H_6 \rightarrow CH_3CHOOA + HCHO$      | $2.75 \times 10^{-15} \times \exp(-1880/T) / \text{molecules}^{-1} \text{cm}^3 \text{s}^{-1}$ | (R6)   |

|                                                  |                                                                                                                                                                                                                                                                                                                                                                                                                                                                                                            |       |
|--------------------------------------------------|------------------------------------------------------------------------------------------------------------------------------------------------------------------------------------------------------------------------------------------------------------------------------------------------------------------------------------------------------------------------------------------------------------------------------------------------------------------------------------------------------------|-------|
| $O_3 + C_5H_8 \rightarrow CH_2OOE + MACR$        | $3.09 \times 10^{-15} \times \exp(-1995/T) / \text{molecules}^{-1} \text{cm}^3 \text{s}^{-1}$                                                                                                                                                                                                                                                                                                                                                                                                              | (R7)  |
| $O_3 + C_5H_8 \rightarrow CH_2OOE + MVK$         | $2.06 \times 10^{-15} \times \exp(-1995/T) / \text{molecules}^{-1} \text{cm}^3 \text{s}^{-1}$                                                                                                                                                                                                                                                                                                                                                                                                              | (R8)  |
| $O_3 + C_5H_8 \rightarrow HCHO + MACROOA$        | $3.09 \times 10^{-15} \times \exp(-1995/T) / \text{molecules}^{-1} \text{cm}^3 \text{s}^{-1}$                                                                                                                                                                                                                                                                                                                                                                                                              | (R9)  |
| $O_3 + C_5H_8 \rightarrow HCHO + MVKOOA$         | $2.06 \times 10^{-15} \times \exp(-1995/T) / \text{molecules}^{-1} \text{cm}^3 \text{s}^{-1}$                                                                                                                                                                                                                                                                                                                                                                                                              | (R10) |
| $O_3 + HO_2 \rightarrow OH$                      | $2.03 \times 10^{-16} \times (T/300)^{4.57} \times \exp(693/T) / \text{molecules}^{-1} \text{cm}^3 \text{s}^{-1}$                                                                                                                                                                                                                                                                                                                                                                                          | (R11) |
| $RO_2 + NO_2 \rightarrow \text{peroxy nitrates}$ | $(3.28 \times 10^{-28} \times 7.24 \times 10^{18} \times P/T \times (T/300)^{-6.87} \times 1.125 \times 10^{-11} \times (T/300)^{-1.105}) \times 10^{(\log_{10}(0.30)/(1+(\log_{10}(2.916 \times 10^{-17} \times 7.24 \times 10^{18} \times P/T \times (T/300)^{-5.765})/(0.75-1.27 \times \log_{10}(0.30)))^2))} / (3.28 \times 10^{-28} \times 7.24 \times 10^{18} \times P/T \times (T/300)^{-6.87} + 1.125 \times 10^{-11} \times (T/300)^{-1.105}) / \text{molecules}^{-1} \text{cm}^3 \text{s}^{-1}$ | (R12) |
| $NO_2 + OH \rightarrow HNO_3$                    | $(3.2 \times 10^{-30} \times 7.24 \times 10^{18} \times P/T \times (T/300)^{-4.5}) \times 3 \times 10^{-11} \times 10^{(\log_{10}(0.41)/(1+(\log_{10}((3.2 \times 10^{-30} \times 7.24 \times 10^{18} \times P/T \times (T/300)^{-4.5})/(3 \times 10^{-11}))/((0.75-1.27 \times (\log_{10}(0.41))))^2))} / (3.2 \times 10^{-30} \times 7.24 \times 10^{18} \times P/T \times (T/300)^{-4.5} + 3 \times 10^{-11}) / \text{molecules}^{-1} \text{cm}^3 \text{s}^{-1}$                                        | (R13) |
| $O_3 + OH \rightarrow HO_2$                      | $1.70 \times 10^{-12} \times \exp(-940/T) / \text{molecules}^{-1} \text{cm}^3 \text{s}^{-1}$                                                                                                                                                                                                                                                                                                                                                                                                               | (R14) |

**Table S2. Measured VOCs concentrations during the observation periods at SZMGT (units: pptv).**

| Chemicals                | Classification | Mean±SD (pptv) |            |             |               |                |
|--------------------------|----------------|----------------|------------|-------------|---------------|----------------|
|                          |                | Episode I      | Episode II | Episode III | Non-episode I | Non-episode II |
| Aromatics                |                | 6738±5151      | 15147±8995 | 7107±5771   | 4748±3343     | 10530±10027    |
| toluene                  | NMHC/ AVOCs    | 3336±2496      | 7864±4298  | 3682±2648   | 2364±1697     | 5281±4919      |
| <i>m/p</i> -xylene       | NMHC/ AVOCs    | 1444±1188      | 3097±2069  | 1390±1354   | 968±768       | 2223±2279      |
| ethylbenzene             | NMHC/ AVOCs    | 613±504        | 1315±878   | 590±575     | 411±297       | 944±968        |
| <i>o</i> -xylene         | NMHC/ AVOCs    | 593±489        | 1273±850   | 571±556     | 398±288       | 914±937        |
| benzene                  | NMHC/ AVOCs    | 445±227        | 819±349    | 527±316     | 382±182       | 654±399        |
| styrene                  | NMHC/ AVOCs    | 137±119        | 379±332    | 159±188     | 106±93        | 246±276        |
| 1,2,4-trimethylbenzene   | NMHC/ AVOCs    | 36±27          | 84±46      | 39±28       | 25±18         | 57±53          |
| <i>m</i> -ethyltoluene   | NMHC/ AVOCs    | 35±26          | 82±45      | 38±28       | 25±18         | 55±51          |
| <i>p</i> -ethyltoluene   | NMHC/ AVOCs    | 19±14          | 45±25      | 21±15       | 14±10         | 30±28          |
| <i>n</i> -propylbenzene  | NMHC/ AVOCs    | 19±14          | 44±24      | 21±15       | 13±10         | 30±28          |
| <i>o</i> -ethyltoluene   | NMHC/ AVOCs    | 18±14          | 43±24      | 20±15       | 13±9          | 29±27          |
| isopropylbenzene         | NMHC/ AVOCs    | 12±9           | 28±15      | 13±10       | 9±6           | 19±18          |
| 1,2,3-trimethylbenzene   | NMHC/ AVOCs    | 11±8           | 26±14      | 12±9        | 8±6           | 17±16          |
| <i>p</i> _diethylbenzene | NMHC/ AVOCs    | 8±6            | 20±11      | 9±7         | 6±4           | 13±12          |

|                          |             |             |             |             |             |             |
|--------------------------|-------------|-------------|-------------|-------------|-------------|-------------|
| 1,3,5-trimethylbenzene   | NMHC/ AVOCs | 7±5         | 13±9        | 7±5         | 5±3         | 11±10       |
| <i>m</i> -diethylbenzene | NMHC/ AVOCs | 4±3         | 10±6        | 5±3         | 3±2         | 7±6         |
| OVOCs                    |             | 39720±20318 | 66267±28451 | 48377±29973 | 26783±15486 | 47046±33037 |
| methanol                 | OVOC        | 8418±3917   | 15131±5681  | 10324±6640  | 6136±3448   | 10682±7116  |
| formaldehyde             | OVOC        | 9449±4089   | 11853±3042  | 10562±4843  | 5303±3053   | 9165±4511   |
| ethanol                  | OVOC        | 7710±3756   | 14390±7288  | 10535±6910  | 6005±3201   | 10312±8417  |
| acetone                  | OVOC        | 4365±2953   | 7549±4676   | 5701±3897   | 2699±1586   | 4275±2829   |
| hydroxyacetone           | OVOC        | 4047±2445   | 7007±2751   | 4543±3121   | 2766±1884   | 5448±4699   |
| acetaldehyde             | OVOC        | 2532±1355   | 4367±1729   | 3007±1880   | 1697±956    | 3126±2244   |
| methyl ethyl ketone      | OVOC        | 2310±1432   | 4723±2757   | 2715±2226   | 1653±984    | 3171±2722   |
| acrolein                 | OVOC        | 512±191     | 731±263     | 605±227     | 301±208     | 487±295     |
| methyl vinyl ketone      | OVOC        | 179±70      | 207±80      | 185±98      | 89±73       | 170±78      |
| methacrylaldehyde        | OVOC        | 124±49      | 144±55      | 128±68      | 62±51       | 118±54      |
| <i>m</i> -cresol         | OVOC        | 50±40       | 97±50       | 46±41       | 43±25       | 55±37       |
| phenol                   | OVOC        | 24±20       | 66±79       | 26±22       | 28±18       | 36±35       |
| Acetylene                |             | 1836±1259   | 3967±2168   | 1857±1336   | 1192±855    | 2664±2481   |
| Acetylene                | NMHC/ AVOCs | 1836±1259   | 3967±2168   | 1857±1336   | 1192±855    | 2664±2481   |
| Alkanes                  |             | 28108±21030 | 66256±36213 | 31017±22307 | 19916±14296 | 44495±41443 |
| <i>n</i> -butane         | NMHC/ AVOCs | 7972±5965   | 18793±10271 | 8797±6327   | 5649±4055   | 12620±11755 |
| propane                  | NMHC/ AVOCs | 6417±4801   | 15127±8268  | 7081±5093   | 4547±3264   | 10159±9462  |
| isobutane                | NMHC/ AVOCs | 4513±3376   | 10637±5814  | 4980±3581   | 3198±2295   | 7144±6654   |
| ethane                   | NMHC/ AVOCs | 3134±2345   | 7388±4038   | 3458±2487   | 2221±1594   | 4961±4621   |
| isopentane               | NMHC/ AVOCs | 1550±1160   | 3654±1997   | 1710±1230   | 1098±788    | 2454±2285   |
| <i>n</i> -pentane        | NMHC/ AVOCs | 1422±1064   | 3353±1832   | 1569±1128   | 1008±723    | 2251±2097   |
| <i>n</i> -hexane         | NMHC/ AVOCs | 574±429     | 1352±739    | 633±455     | 406±291     | 908±846     |
| 2-methylpentane          | NMHC/ AVOCs | 428±321     | 1010±552    | 473±340     | 304±218     | 678±632     |
| 3-methylpentane          | NMHC/ AVOCs | 383±286     | 902±493     | 422±304     | 271±195     | 606±564     |
| 3-methylhexane           | NMHC/ AVOCs | 228±171     | 538±294     | 252±181     | 162±116     | 361±336     |
| 2-methylhexane           | NMHC/ AVOCs | 177±132     | 417±228     | 195±140     | 125±90      | 280±261     |
| cyclohexane              | NMHC/ AVOCs | 176±        | 414±227     | 194±140     | 125±89      | 278±259     |
| <i>n</i> -heptane        | NMHC/ AVOCs | 161±121     | 380±208     | 178±120     | 114±82      | 255±238     |
| methylcyclopentane       | NMHC/ AVOCs | 113±85      | 267±146     | 125±90      | 80±58       | 180±167     |
| 2,3-dimethylbutane       | NMHC/ AVOCs | 110±83      | 260±142     | 122±88      | 78±56       | 175±163     |
| <i>n</i> -octane         | NMHC/ AVOCs | 99±74       | 233±127     | 109±78      | 70±50       | 156±146     |
| methylcyclohexane        | NMHC/ AVOCs | 92±69       | 217±119     | 102±73      | 65±47       | 146±136     |
| 2,3-dimethylpentane      | NMHC/ AVOCs | 86±64       | 203±111     | 95±68       | 78±56       | 136±127     |

|                         |             |           |           |           |           |           |
|-------------------------|-------------|-----------|-----------|-----------|-----------|-----------|
| 2,2-dimethylbutane      | NMHC/ AVOCs | 64±48     | 151±83    | 71±51     | 46±33     | 102±95    |
| cyclopentane            | NMHC/ AVOCs | 63±47     | 149±82    | 70±50     | 45±32     | 100±93    |
| <i>n</i> -dodecane      | NMHC/ AVOCs | 62±46     | 145±80    | 68±49     | 44±31     | 98±91     |
| 2,4-dimethylpentane     | NMHC/ AVOCs | 49±37     | 116±64    | 54±39     | 35±25     | 78±73     |
| <i>n</i> -decane        | NMHC/ AVOCs | 44±33     | 104±57    | 49±35     | 31±22     | 70±65     |
| <i>n</i> -nonane        | NMHC/ AVOCs | 42±32     | 100±55    | 47±34     | 30±22     | 67±62     |
| <i>n</i> -undecane      | NMHC/ AVOCs | 37±28     | 88±48     | 41±30     | 26±19     | 59±55     |
| 3-methylheptane         | NMHC/ AVOCs | 37±27     | 84±46     | 32±23     | 25±18     | 57±53     |
| 2-methylheptane         | NMHC/ AVOCs | 29±21     | 68±37     | 39±28     | 20±15     | 45±42     |
| 2,2,4-trimethylpentane  | NMHC/ AVOCs | 26±19     | 61±34     | 29±21     | 18±13     | 41±38     |
| 2,3,4-trimethylpentane  | NMHC/ AVOCs | 19±14     | 44±24     | 21±15     | 13±10     | 30±28     |
| Alkenes                 | NMHC/ AVOCs | 2202±1561 | 5043±2664 | 2492±1716 | 1530±1119 | 3422±3120 |
| ethylene                | NMHC/ AVOCs | 1494±1326 | 3187±1742 | 1492±1073 | 958±688   | 2141±1994 |
| propylene               | NMHC/ AVOCs | 412±365   | 878±480   | 411±296   | 264±190   | 590±549   |
| 1-butene                | NMHC/ AVOCs | 163±145   | 348±190   | 163±117   | 105±75    | 234±218   |
| 1-pentene               | NMHC/ AVOCs | 29±26     | 62±34     | 29±21     | 19±13     | 42±39     |
| 1-hexene                | NMHC/ AVOCs | 15±13     | 31±47     | 15±11     | 9±7       | 21±20     |
| <i>trans</i> -2-butene  | NMHC/ AVOCs | 11±10     | 24±13     | 11±8      | 7±5       | 16±15     |
| <i>cis</i> -2-butene    | NMHC/ AVOCs | 11±10     | 24±14     | 11±8      | 7±5       | 16±15     |
| <i>trans</i> -2-pentene | NMHC/ AVOCs | 5±4       | 10±6      | 5±3       | 3±2       | 4±4       |
| <i>cis</i> -2-pentene   | NMHC/ AVOCs | 3±3       | 6±3       | 3±2       | 2±1       | 7±6       |
| isoprene                | NMHC/ BVOC  | 277±185   | 471±165   | 351±176   | 156±132   | 351±260   |
